# Supplementary material
Source: PubMed Central journal article supplement (PMC5510777)
Supplement: Supp_Figure1.pdf [file Supp_Figure1.pdf]

Data File: C:\Users\UniBa\Desktop\Rob&Paola\21.02.2017\_PEA\_contamination\PEA\_new\_01.lcd

| Elmt | Val. | Min | Max  | Elmt | Val. | Min | Max | Use Adduct |
|------|------|-----|------|------|------|-----|-----|------------|
| H    | 1    | 0   | 1000 | P    | 3    | 0   | 0   | H          |
| C    | 4    | 0   | 300  | Zn   | 2    | 0   | 0   | Na         |
| N    | 3    | 0   | 2    | Mo   | 2    | 0   | 0   | K          |
| O    | 2    | 0   | 100  |      |      |     |     | NH4        |

Error Margin (ppm): 5  
 HC Ratio: unlimited  
 Max Isotopes: all  
 MSn Iso RI (%): 75.00

DBE Range: -2.0 - 1000.0  
 Apply N Rule: yes  
 Isotope RI (%): 1.00  
 MSn Logic Mode: AND

Electron Ions: both  
 Use MSn Info: no  
 Isotope Res: 10000  
 Max Results: 500

Event#: 1 MS(E+) Ret. Time : 6.333 -> 6.517 - 4.900 -> 5.800 Scan#: 761 -> 783 - 589 -> 697

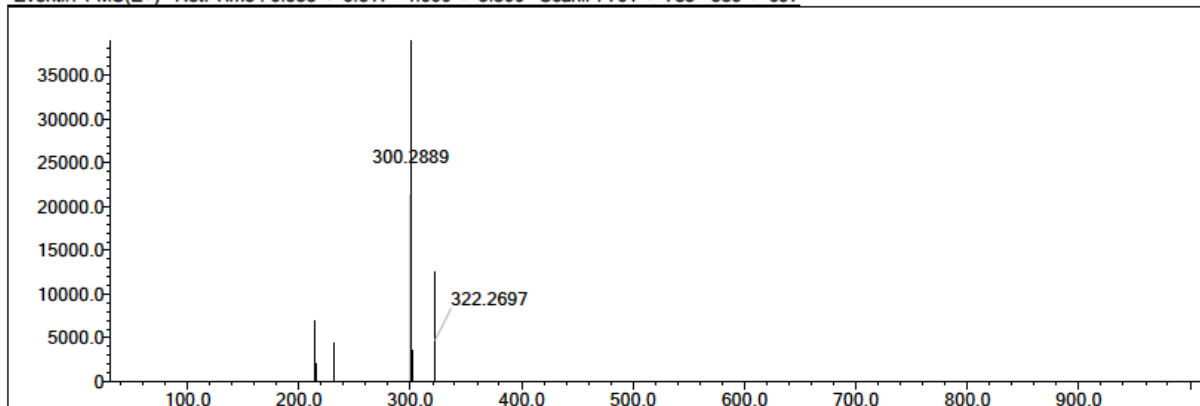

Measured region for 300.2889 m/z

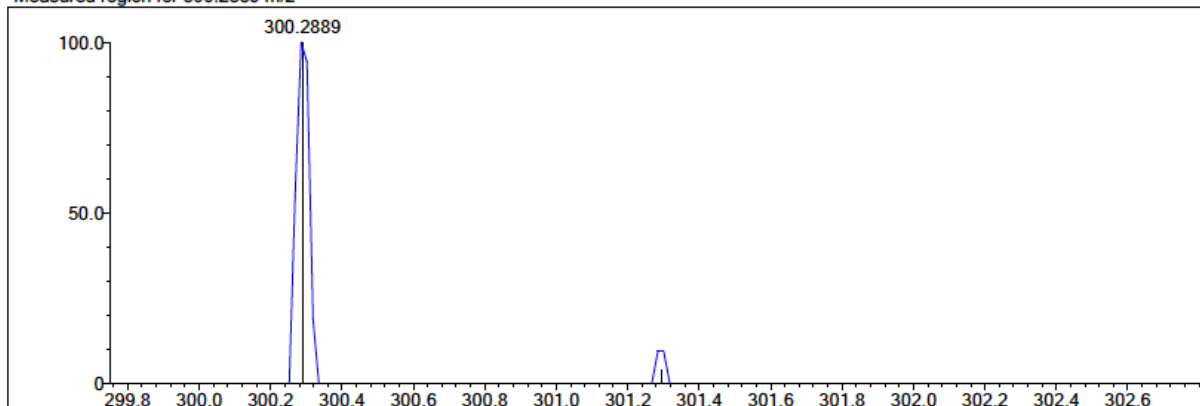

C18 H37 N O2 [M+H]<sup>+</sup> : Predicted region for 300.2897 m/z

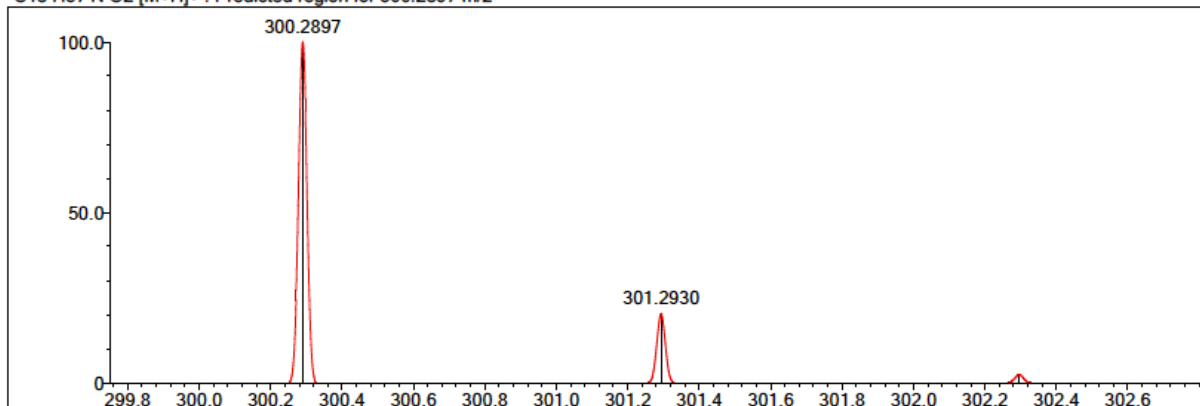

| Rank | Score | Formula (M)  | Ion                | Meas. m/z | Pred. m/z | Df. (mDa) | Df. (ppm) | Iso   | DBE |
|------|-------|--------------|--------------------|-----------|-----------|-----------|-----------|-------|-----|
| 1    | 62.42 | C18 H37 N O2 | [M+H] <sup>+</sup> | 300.2889  | 300.2897  | -0.8      | -2.66     | 65.12 | 1.0 |
