# Supplementary material
Source: PubMed Central journal article supplement (PMC5510777)
Supplement: Supp_Figure4.pdf [file Supp_Figure4.pdf]

Fig S4

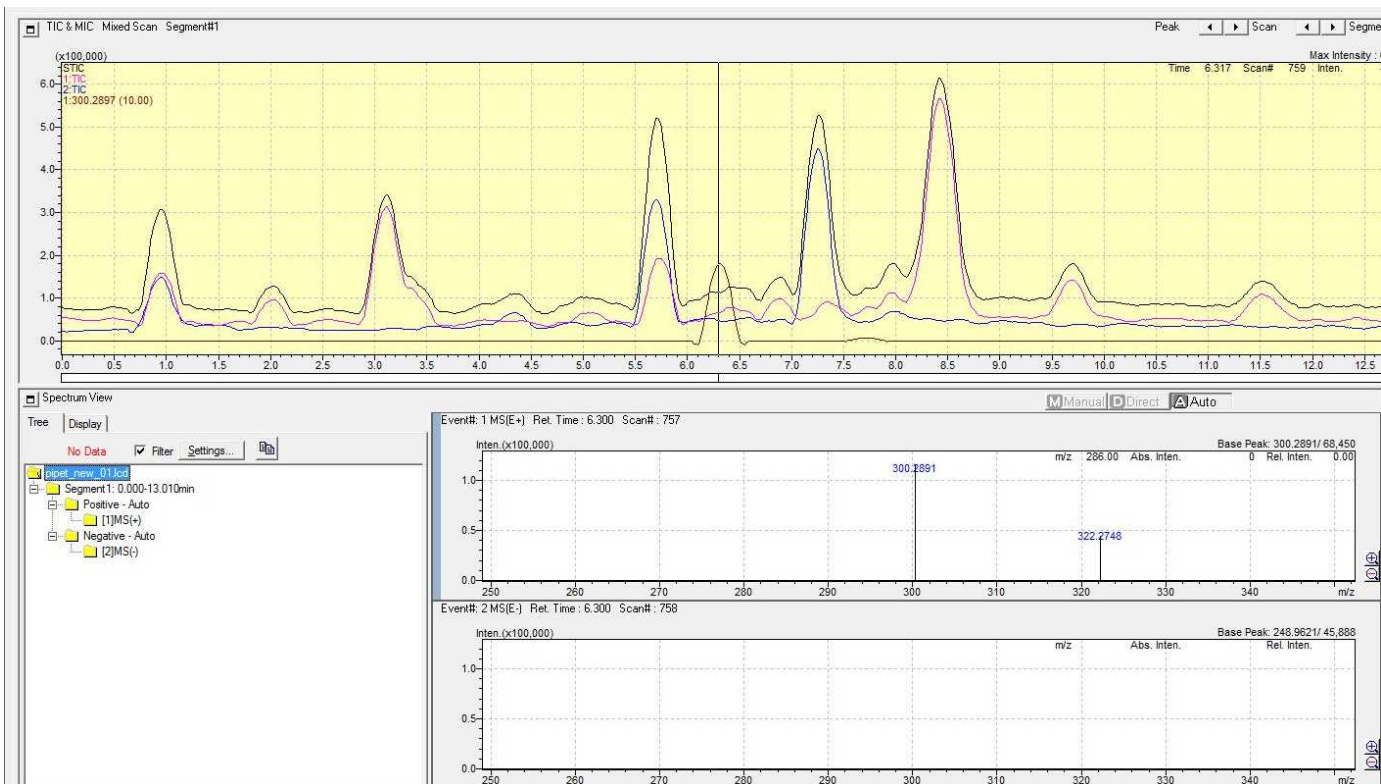

Fig. S4: MS1 LC profile of the pipet extract. Negative TIC is shown in blue; positive TIC is in violet and summed TIC is in black. In brown EIC of PEA accurate mass at 300.2897 Th, RT 6.3.
