# Supplementary material
Source: PubMed Central journal article supplement (PMC5510777)
Supplement: Supp_Figure6.pdf [file Supp_Figure6.pdf]

Fig S6

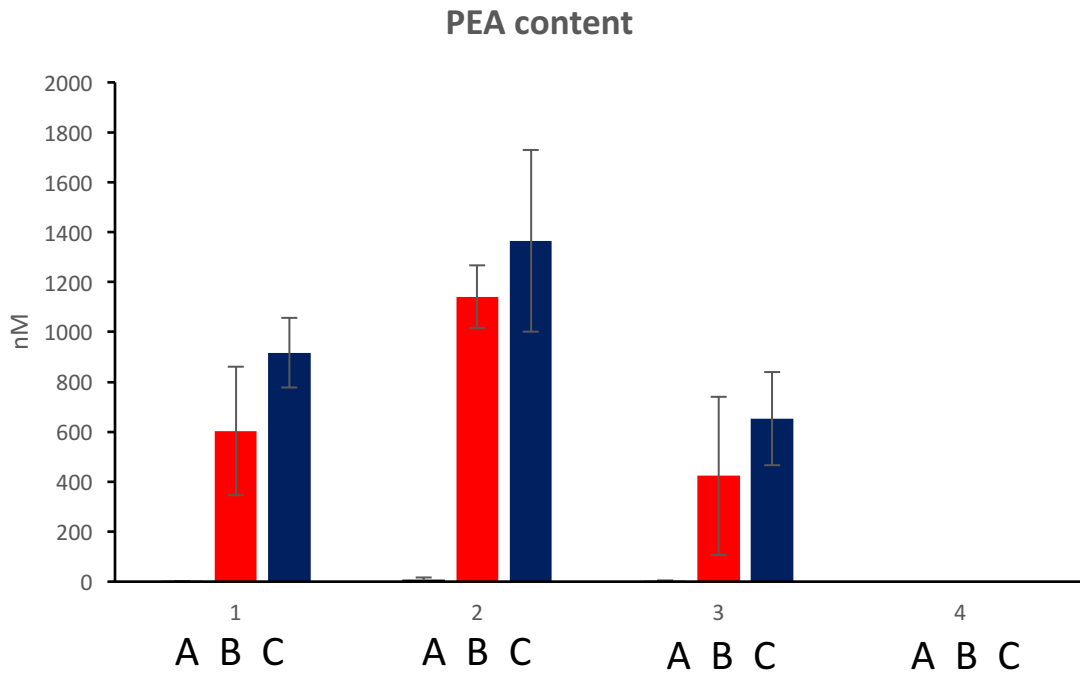

- 1) Fisher pasteur pipettes, 5  $\frac{3}{4}$  ", LOT n. 16168998, BOX 1
- 2) Fisher pasteur pipettes, 5  $\frac{3}{4}$  ", LOT n. 16168998, BOX 2
- 3) VWR pasteur pipettes, 5  $\frac{3}{4}$  ", LOT n. 16140309
- 4) Fisher pasteur pipette, 9 ", LOT n. 11004660

- A) 1 pp, rinsed once with 8ml CHCl<sub>3</sub>, "extracted/washed" with 8mL CHCl<sub>3</sub>, dried and reconstituted in 100 $\mu$ L
- B) 2pp, no rinse, "extracted/washed" with 16mL CHCl<sub>3</sub> (8mL each), dried and reconstituted in 100 $\mu$ L
- C) 3pp, no rinse, "extracted/washed" with 24mL CHCl<sub>3</sub> (8mL each), dried and reconstituted in 100 $\mu$ L

n=3

SD is calculated on triplicates exp.
