# Supplementary material
Source: PubMed Central journal article supplement (PMC5510777)

Fig S5

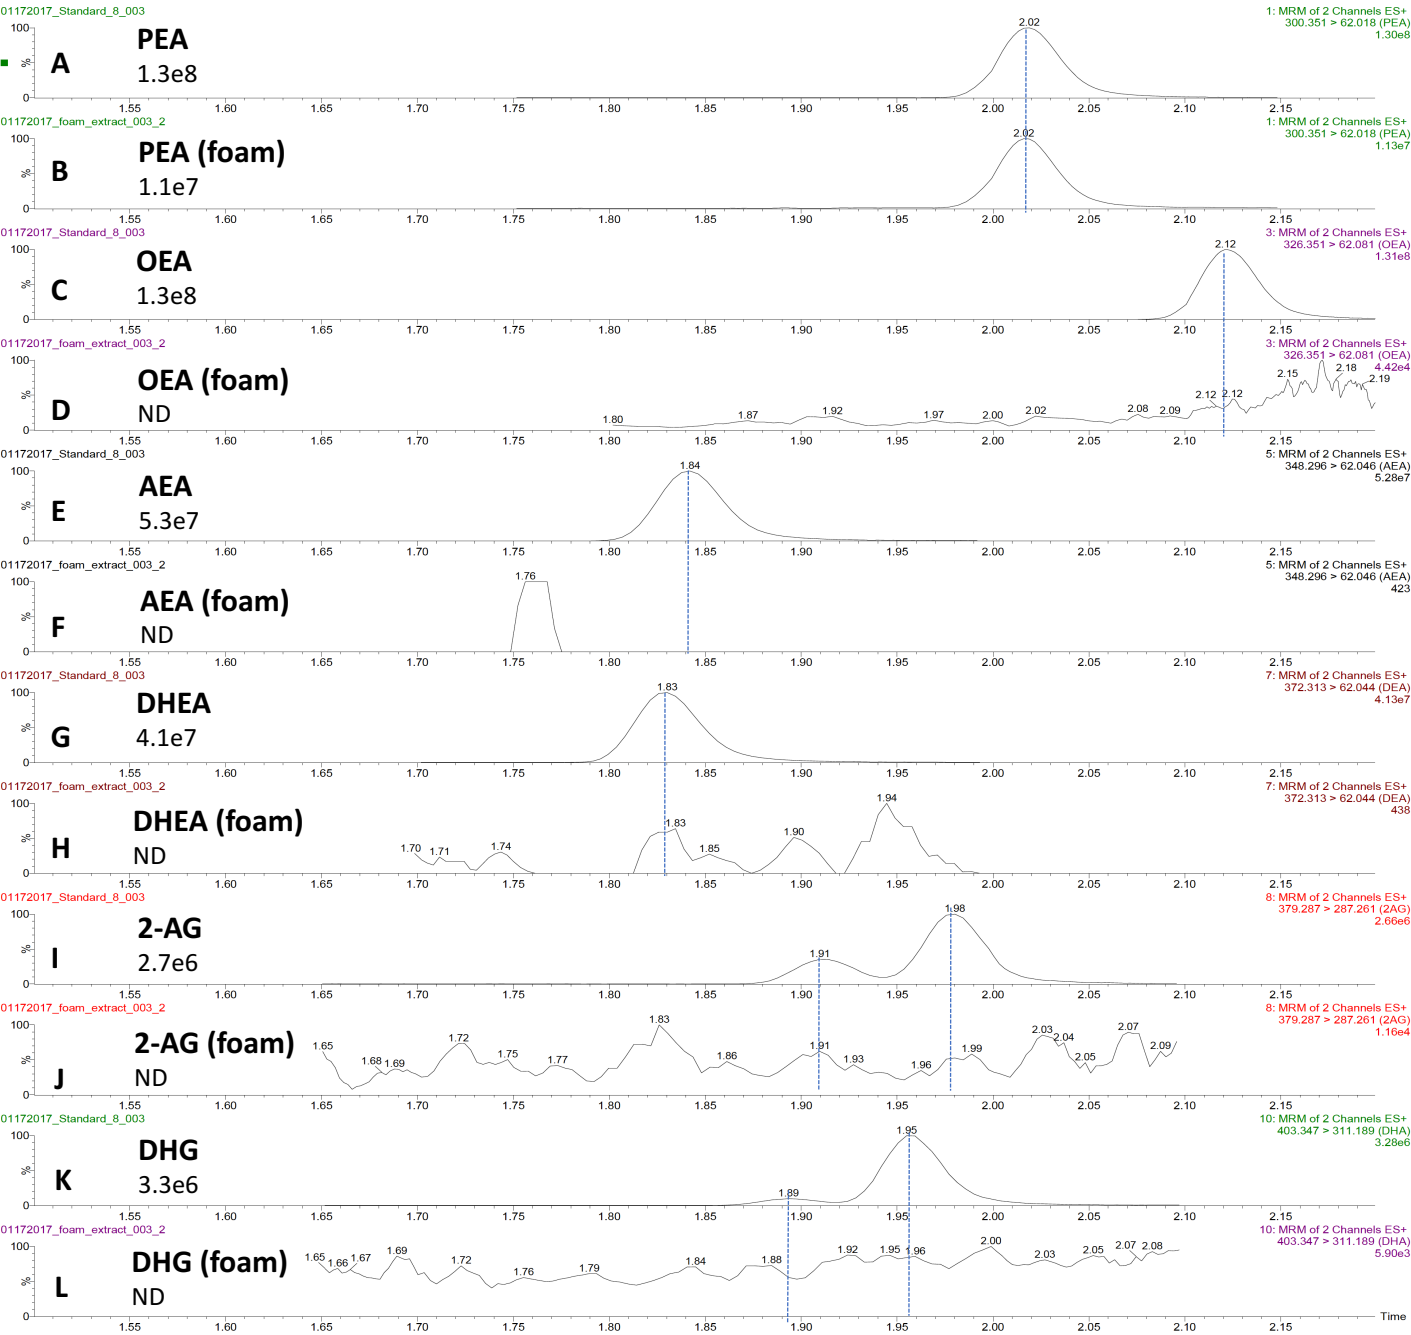

Supplement: Supp_Figure5.pdf [file Supp_Figure5.pdf]

Fig S7

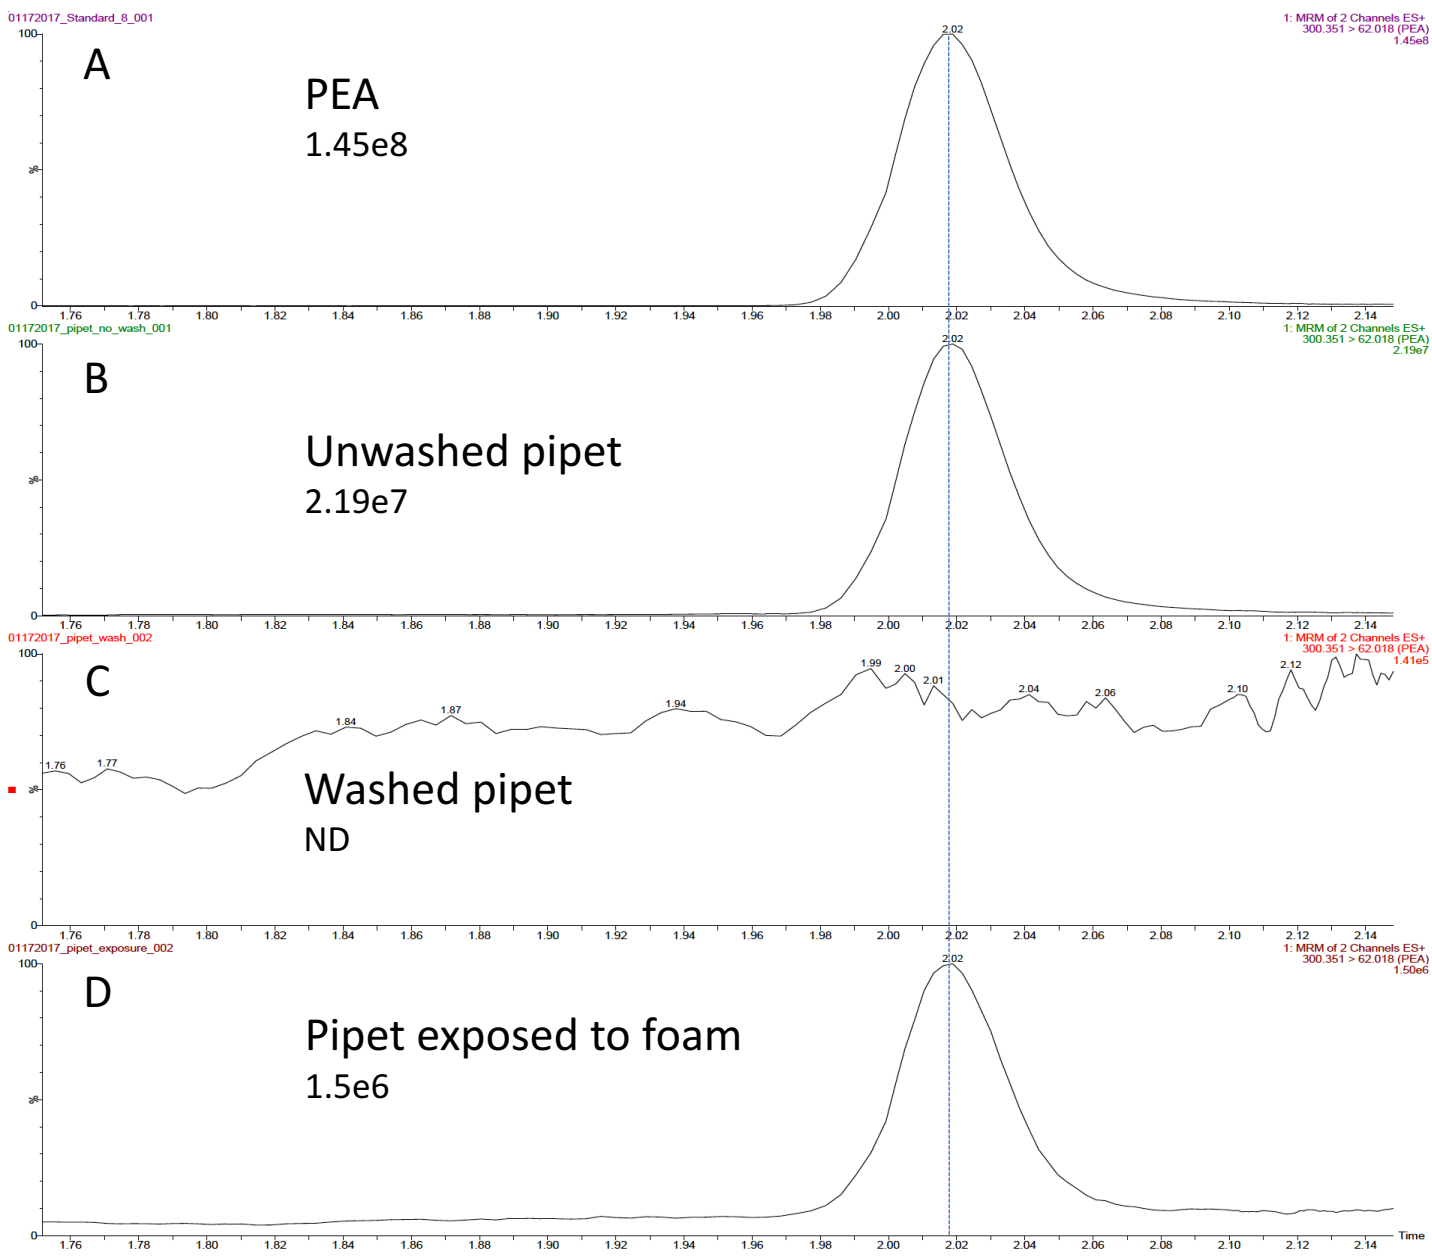

Supplement: Supp_Figure7.pdf [file Supp_Figure7.pdf]
